# Supplementary material for: Does Product Placement Change Television Viewers’ Social Behavior?
Source: PLoS One. 2015 Sep 23;10(9):e0138610. doi: 10.1371/journal.pone.0138610 (PMC4580471; doi:10.1371/journal.pone.0138610)
Supplement: S1 Table — The eight messages randomly assigned to be broadcast within a five-week time period, in one of three possible telenovelas. Each telenovela was divided into four time periods of approximately five weeks, excluding four weeks of introduction to the telenovela, during which characters and plots were developed. The table indicates to which telenovela of three each message was assigned, and the dates of that time period (the telenovelas were broadcast in sequence from first to third, but overlapped in time). All outcome data gathered to measure each variable are listed in the final column; most data were gathered over a timespan of three years, depending on availability. Three messages were broadcast late, after the end of the randomization window, for arbitrary reasons related to the telenovela’s broadcasting schedule. They were: one scene featuring the “Open a bank account” message, aired 3 days after the assigned time-frame had ended, two scenes for the the “Seek out university scholarships” message, aired 1 and 7 days after the assigned time-frame had ended, and one of the scenes for the “Use carseats for infants” message, aired 11 days after the assigned time-frame had ended. (PDF) [file pone.0138610.s001.pdf]

|                                        |   |                             |                                                                |                                                                                                                                                                                                                                                                   |
|----------------------------------------|---|-----------------------------|----------------------------------------------------------------|-------------------------------------------------------------------------------------------------------------------------------------------------------------------------------------------------------------------------------------------------------------------|
|                                        |   |                             | Google Searching<br>behavior                                   | “Has savings account”<br>“Banco”<br>“Como abrir una cuenta”<br>“Robo”<br>“BB&T”<br>“Bank”                                                                                                                                                                         |
| Register to vote                       | 1 | 27-04-2012 to<br>03-05-2012 | Administrative<br>Survey Panel<br>Google Searching<br>behavior | Voting registration by Hispanics, 01-01-2010 to 06-29-2013<br>“It is important to be informed to vote”<br>“Reports being a member of any club or organization listed”<br>“Reports being registered to vote”<br>“Rock the vote”<br>“Eleccion”<br>“Voto”<br>“Votar” |
| Don’t drink<br>and drive               | 2 | 14-03-2012 to<br>10-04-2012 | Administrative<br>Google Searching<br>behavior                 | Drunk driving arrests of Hispanics in 7 US cities<br>“DUI”<br>“Borracho”                                                                                                                                                                                          |
| Seek out<br>university<br>scholarships | 2 | 18-05-2012 to<br>31-05-2012 | Administrative<br>Survey Panel<br>Google Searching<br>behavior | Hits to Scholarship site recommended in the plotline<br>“Owns 529 college savings ”<br>“Owns other college savings ”<br>“Yale”<br>“Beca”<br>“Universidad”<br>“Prestamo”<br>“Diseño gráfico”                                                                       |
| Eat healthy:<br>vegetables             | 3 | 12-07-2012 to<br>12-07-2012 | Survey Panel                                                   | “Works on eating a well balanced diet”<br>“Bought low-calorie foods when watching diet”                                                                                                                                                                           |

|                             |   |                              |                                                  |                                                                                                                                                                                                                                                                                                                                                                                                                                                 |
|-----------------------------|---|------------------------------|--------------------------------------------------|-------------------------------------------------------------------------------------------------------------------------------------------------------------------------------------------------------------------------------------------------------------------------------------------------------------------------------------------------------------------------------------------------------------------------------------------------|
|                             |   |                              | Google Searching<br>behavior                     | “Eats food regardless of calories”<br>“Presently watching diet”<br>“Tries to eat healthy food or balanced diet”<br>“Tries to include more fiber into diet”<br>“Looks for freshest ingredients when cooking”<br>“Uses fresh produce”<br>“Tries to eat healthier foods these days”<br>“Uses bagged/ packaged salad”<br>“Eats frozen vegetables”<br><br>“Papas fritas”<br>“Sobrepeso”<br>“Uvas”<br>“Mangos”<br>“Leche”<br>“Manzanas”<br>“Verduras” |
| Don’t smoke                 | 3 | <i>**Not<br/>implemented</i> | NA                                               | NA                                                                                                                                                                                                                                                                                                                                                                                                                                              |
| Use carseats<br>for infants | 3 | 28-08-2012 to<br>21-09-2012  | Survey Panel<br><br>Google Searching<br>behavior | “Car safety features are important”<br>“Looked up car safety rating before purchase”<br>“Regularly wears seatbelt”<br><br>“Accidente automovilistico”<br>“Carseat”                                                                                                                                                                                                                                                                              |
